# Supplementary material for: The US7 score is sensitive to change in a large cohort of patients with rheumatoid arthritis over 12 months of therapy
Source: PubMed Central journal article supplement — Ann Rheum Dis. 2012 Sep 6;72(7):1163–9. doi: 10.1136/annrheumdis-2012-201397 (PMC3686255; doi:10.1136/annrheumdis-2012-201397), 2012-09-06
Supplement: annrheumdis-2012-201397-s1.pdf [file annrheumdis-2012-201397-s1.pdf]

**Tables S1-S4:** US, clinical and laboratory parameters under various therapies over twelve months of different therapies. (\*Values are the mean  $\pm$  SD; {95%CI})

**Table S1: Group 1 (before and after start of first-line DMARDs)**

| <b>Group 1 (n=118)</b>                 | <b>baseline</b>                            | <b>3 months</b>                                              | <b>6 months</b>                                              | <b>12 months</b>                                             |
|----------------------------------------|--------------------------------------------|--------------------------------------------------------------|--------------------------------------------------------------|--------------------------------------------------------------|
| <b>Synovitis sum score in GSUS</b>     | 9.0 $\pm$ 5.4<br>{95%CI: 8.03-9.99}        | 6.1 $\pm$ 4.8<br>{95%CI: 5.24-7.02}<br><b>p&lt;0.001</b>     | 5.2 $\pm$ 4.5<br>{95%CI: 4.38-6.03}<br><b>p&lt;0.001</b>     | 4.4 $\pm$ 4.3<br>{95%CI: 3.61-5.19}<br><b>p&lt;0.001</b>     |
| <b>Synovitis sum score in PDUS</b>     | 4.0 $\pm$ 4.8<br>{95%CI: 3.17-4.94}        | 1.8 $\pm$ 2.4<br>{95%CI: 1.38-2.28}<br><b>p&lt;0.001</b>     | 1.4 $\pm$ 2.2<br>{95%CI: 0.99-1.84}<br><b>p&lt;0.001</b>     | 1.3 $\pm$ 2.1<br>{95%CI: 0.87-1.65}<br><b>p&lt;0.001</b>     |
| <b>Tenosynovitis sum score in GSUS</b> | 1.6 $\pm$ 1.9<br>{95%CI: 1.23-1.90}        | 0.7 $\pm$ 1.2<br>{95%CI: 0.53-0.96}<br><b>p&lt;0.001</b>     | 0.6 $\pm$ 1.1<br>{95%CI: 0.35-0.75}<br><b>p&lt;0.001</b>     | 0.4 $\pm$ 0.9<br>{95%CI: 0.27-0.59}<br><b>p&lt;0.001</b>     |
| <b>Tenosynovitis sum score in PDUS</b> | 1.0 $\pm$ 1.8<br>{95%CI: 0.62-1.36}        | 0.4 $\pm$ 1.2<br>{95%CI: 0.19-0.65}<br><b>p&lt;0.001</b>     | 0.3 $\pm$ 0.8<br>{95%CI: 0.12-0.43}<br><b>p&lt;0.001</b>     | 0.2 $\pm$ 0.65<br>{95%CI: 0.03-0.28}<br><b>p&lt;0.001</b>    |
| <b>Erosion sum score</b>               | 2.8 $\pm$ 3.9 (0-14)<br>{95%CI: 2.08-3.51} | 2.7 $\pm$ 3.7<br>{95%CI: 2.00-3.36}<br>p=0.989               | 2.8 $\pm$ 3.9<br>{95%CI: 3.10-3.51}<br>p=0.793               | 2.9 $\pm$ 3.9<br>{95%CI: 2.41-3.57}<br>p=0.722               |
| <b>ESR mm/h</b>                        | 31.1 $\pm$ 22.3<br>{95%CI: 27.08-35.12}    | 21.8 $\pm$ 18.6<br>{95%CI: 18.45-25.15}<br><b>p&lt;0.001</b> | 19.7 $\pm$ 18.0<br>{95%CI: 16.45-22.95}<br><b>p&lt;0.001</b> | 17.2 $\pm$ 15.4<br>{95%CI: 14.42-19.98}<br><b>p&lt;0.001</b> |
| <b>CRP mg/l</b>                        | 20.5 $\pm$ 28.6<br>{95%CI: 15.35-25.65}    | 6.9 $\pm$ 10.3<br>{95%CI: 5.03-8.77 }<br><b>p&lt;0.001</b>   | 5.2 $\pm$ 6.9<br>{95%CI: 3.96-6.44}<br><b>p&lt;0.001</b>     | 5.6 $\pm$ 7.2<br>{95%CI: 4.3-6.9}<br><b>p&lt;0.001</b>       |
| <b>DAS28</b>                           | 5.0 $\pm$ 1.4<br>{95%CI: 4.75-5.25}        | 3.5 $\pm$ 1.4<br>{95%CI: 3.24-3.75}<br><b>p&lt;0.001</b>     | 3.3 $\pm$ 1.4<br>{95%CI: 3.05-3.55}<br><b>p&lt;0.001</b>     | 2.9 $\pm$ 1.4<br>{95%CI: 2.65-3.15}<br><b>p&lt;0.001</b>     |

Table S2: Group 2 (therapy switch from DMARDs to second DMARDs)

| Group 2 (n=108)                 | Baseline                          | 3 months                                            | 6 months                                            | 12 months                                           |
|---------------------------------|-----------------------------------|-----------------------------------------------------|-----------------------------------------------------|-----------------------------------------------------|
| Synovitis sum score in GSUS     | 7.4±4.3<br>{95%CI: 6.58-8.22}     | 6.5±4.4<br>{95%CI: 5.62-7.31}<br><b>p=0.005</b>     | 6.4±4.3<br>{95%CI: 5.57-7.22}<br><b>p=0.006</b>     | 6.1±4.8<br>{95%CI: 5.21-7.03}<br><b>p=0.001</b>     |
| Synovitis sum score in PDUS     | 2.6±3.2<br>{95%CI: 2.00-3.29}     | 1.8±2.4<br>{95%CI: 1.32-2.29}<br><b>p=0.012</b>     | 1.6±2.5<br>{95%CI: 1.08-2.08}<br><b>p&lt;0.001</b>  | 1.2±2.3<br>{95%CI: 0.78-1.71}<br><b>p&lt;0.001</b>  |
| Tenosynovitis sum score in GSUS | 1.2±2.4<br>{95%CI: 0.89-1.48}     | 0.6±1.1<br>{95%CI: 0.38-0.8}<br><b>p&lt;0.001</b>   | 0.5±1.0<br>{95%CI: 0.36-0.73}<br><b>p&lt;0.001</b>  | 0.4±0.9<br>{95%CI: 0.22-0.57}<br><b>p&lt;0.001</b>  |
| Tenosynovitis sum score in PDUS | 0.8±1.7<br>{95%CI: 0.4-1.1}       | 0.2±0.7<br>{95%CI: 0.09-0.38}<br><b>p=0.001</b>     | 0.3±0.8<br>{95%CI: 0.1-0.42}<br><b>p=0.003</b>      | 0.2±0.5<br>{95%CI: 0.05-0.25}<br><b>p=0.001</b>     |
| Erosion sum score               | 2.3±3.3<br>{95%CI: 1.86-2.92}     | 2.1±3.2<br>{95%CI: 1.48-2.69}<br>p=0.269            | 2.2±3.3<br>{95%CI: 1.56-2.83}<br>p=0.713            | 2.3±3.4<br>{95%CI: 1.62-2.93}<br>p=0.633            |
| ESR mm/h                        | 25.7±19.4<br>{95%CI: 22.05-29.35} | 20.4±15.2<br>{95%CI: 17.54-23.26}<br><b>p=0.003</b> | 20.2±13.0<br>{95%CI: 17.74-22.66}<br><b>p=0.001</b> | 21.4±14.4<br>{95%CI: 18.69-24.11}<br><b>p=0.014</b> |
| CRP mg/l                        | 13.4±23.0<br>{95%CI: 9.06-17.74}  | 7.8±9.3<br>{95%CI: 6.05-9.55}<br><b>p=0.014</b>     | 7.6±9.2<br>{95%CI: 5.87-9.33}<br><b>p=0.002</b>     | 7.1±7.1<br>{95%CI: 5.75-8.45}<br><b>p=0.001</b>     |
| DAS28                           | 4.3±1.4<br>{95%CI: 4.04-4.56}     | 3.7±1.3<br>{95%CI: 3.45-3.95}<br><b>p&lt;0.001</b>  | 3.6±1.3<br>{95%CI: 3.35-3.85}<br><b>p&lt;0.001</b>  | 3.5±1.3<br>{95%CI: 3.25-3.75}<br><b>p&lt;0.001</b>  |

**Table S3:** Group 3(start with first-line biologic after DMARDs therapy)

| Group 3<br>(n=153)                     | baseline                       | 3 months                                               | 6 months                                             | 12 months                                              |
|----------------------------------------|--------------------------------|--------------------------------------------------------|------------------------------------------------------|--------------------------------------------------------|
| <b>Synovitis sum score in GSUS</b>     | 9.9±5.7<br>{95%CI: 8.97-10.79} | 7.6±5.5<br>{95%CI: 6.74-8.49}<br><b>p&lt;0.001</b>     | 6.8±5.3<br>{95%CI: 5.92-7.61}<br><b>p&lt;0.001</b>   | 5.6±4.8<br>{95%CI: 4.85-6.37}<br><b>p&lt;0.001</b>     |
| <b>Synovitis sum score in PDUS</b>     | 4.3±4.3<br>{95%CI: 3.64-5.04}  | 2.7±3.8<br>{95%CI: 2.10-3.32}<br><b>p&lt;0.001</b>     | 2.3±3.3<br>{95%CI: 1.73-2.79}<br><b>p&lt;0.001</b>   | 1.4±2.3<br>{95%CI: 1.01-1.75}<br><b>p&lt;0.001</b>     |
| <b>Tenosynovitis sum score in GSUS</b> | 1.7±2.0<br>{95%CI: 1.36-2.00}  | 0.8±1.4<br>{95%CI: 0.56-1.02}<br><b>p&lt;0.001</b>     | 0.6±1.1<br>{95%CI: 0.38- 0.72}<br><b>p&lt;0.001</b>  | 0.5±1.1<br>{95%CI: 0.3-0.65}<br><b>p&lt;0.001</b>      |
| <b>Tenosynovitis sum score in PDUS</b> | 0.9±1.9<br>{95%CI: 0.59-1.22}  | 0.5±1.3<br>{95%CI: 0.23-0.67}<br><b>p=0.001</b>        | 0.3±0.9<br>{95%CI: 0.17-0.46}<br><b>p&lt;0.001</b>   | 0.2±0.8<br>{95%CI: 0.09-0.34}<br><b>p&lt;0.001</b>     |
| <b>Erosion sum score</b>               | 5.0±4.4<br>{95%CI: 4.28-5.67}  | 5.1±4.6<br>{95%CI: 4.38-5.85}<br>p=0.137               | 4.7±4.4<br>{95%CI: 3.97-5.39}<br>p=0.330             | 4.8±4.4<br>{95%CI: 4.12-5.54}<br>p=1.0                 |
| <b>ESR mm/h</b>                        | 33.3±21.7 {95%CI: 29.87-36.73} | 25.3±20.3<br>{95%CI: 22.08-28.52}<br><b>p&lt;0.001</b> | 25.3±19.6<br>{95%CI: 22.2-28.4}<br><b>p&lt;0.001</b> | 23.5±18.4<br>{95%CI: 20.58-26.42}<br><b>p&lt;0.001</b> |
| <b>CRP mg/l</b>                        | 17.3±22.7 {95%CI: 13.7-20.9}   | 11.9±21.7<br>{95%CI: 8.46-15.34}<br><b>p&lt;0.001</b>  | 9.6±13.5<br>{95%CI: 7.46-11.74}<br><b>p&lt;0.001</b> | 6.7±8.4<br>{95%CI: 5.36-8.04}<br><b>p&lt;0.001</b>     |
| <b>DAS28</b>                           | 5.24±1.3<br>{95%CI: 5.03-5.45} | 3.9±1.5<br>{95%CI: 3.67-4.13}<br>p=0.500               | 3.7±1.5<br>{95%CI: 3.47-3.93}<br>p=1.0               | 3.6±1.4<br>{95%CI: 3.38-3.82}                          |

Table S4: Group 4 (therapy change from biologic to second biologic)

| Group 4 (n=53)                         | baseline                          | 3 months                                        | 6 months                                        | 12 months                                        |
|----------------------------------------|-----------------------------------|-------------------------------------------------|-------------------------------------------------|--------------------------------------------------|
| <b>Synovitis sum score in GSUS</b>     | 6.1±4.2<br>{95%CI: 4.95-7.27}     | 5.5±4.5<br>{95%CI: 4.24-6.7}<br>p=0.087         | 5.8±5.4<br>{95%CI: 4.31-7.27}<br>p=0.320        | 4.8±4.9<br>{95%CI: 3.47-8.15}<br><b>p=0.006</b>  |
| <b>Synovitis sum score in PDUS</b>     | 2.4±2.6<br>{95%CI: 1.61-3.16}     | 1.9±2.6<br>{95%CI: 1.13-2.73}<br>p=0.189        | 1.7±2.5<br>{95%CI: 0.84-2.50}<br><b>p=0.041</b> | 1.5±2.5<br>{95%CI: 0.74-2.26}<br><b>p=0.005</b>  |
| <b>Tenosynovitis sum score in GSUS</b> | 1.1±1.6<br>{95%CI: 0.70-1.58}     | 0.6±1.1<br>{95%CI: 0.70-1.58}<br><b>p=0.003</b> | 0.8±1.2<br>{95%CI: 0.42-1.09}<br><b>p=0.043</b> | 0.5±0.8<br>{95%CI: 0.23-0.67}<br><b>p=0.003</b>  |
| <b>Tenosynovitis sum score in PDUS</b> | 0.5±1.1<br>{95%CI: 0.1-0.85}      | 0.5±1.4<br>{95%CI: 0.10-0.92}<br>p=0.497        | 0.3±0.8<br>{95%CI: 0.05-0.57}<br>p=0.407        | 0.2±0.6<br>{95%CI: 0.02-0.35}<br>p=0.281         |
| <b>Erosion sum score</b>               | 4.3±4.2<br>{95%CI: 3.18-5.46}     | 4.3±4.4<br>{95%CI: 3.10-5.54}<br>p=0.953        | 4.1±4.0<br>{95%CI: 2.97-5.18}<br>p=0.389        | 3.6±3.8<br>{95%CI: 2.53-4.64}<br><b>p=0.008</b>  |
| <b>ESR mm/h</b>                        | 26.29±20.8<br>{95%CI: 20.8-31.78} | 24.79±19.5<br>{95%CI: 19.55-30.03}<br>p=0.514   | 21.35±17.2<br>{95%CI: 16.73-25.97}<br>p=0.057   | 22.2±16.9<br>{95%CI: 17.64-26.76}<br>p=0.152     |
| <b>CRP mg/l</b>                        | 8.33±11.0<br>{95%CI: 5.38-11.28}  | 6.87±8.6<br>{95%CI: 4.54-9.2}<br>p=0.227        | 6.16±9.6<br>{95%CI: 3.58-8.74}<br>p=0.080       | 6.21±8.3<br>{95%CI: 3.97-8.45}<br>p=0.186        |
| <b>DAS28</b>                           | 3.84±1.3<br>{95%CI: 3.49-4.19}    | 3.6±1.3<br>{95%CI: 3,25-3,95}<br>p=0.153        | 3.48±1.4<br>{95%CI: 3.11-3.85}<br>p=0.171       | 3.18±1.4<br>{95%CI: 2.81-3.55}<br><b>p=0.004</b> |
